# Supplementary material for: Rhodium-catalyzed asymmetric phenylation of N-phosphinoylarylimines with triphenylborane
Source: Royal Society of Chemistry journal article supplement (doi:10.1039/c0cy00083c), 2011-01-01
Supplement: c0cy00083c.pdf [file c0cy00083c.pdf]

# Rhodium-Catalyzed Asymmetric Phenylation of *N*-Phosphinoylarylimines with Triphenylborane.

Xinyu Hao,<sup>a</sup> Qian Chen,<sup>b</sup> Masami Kuriyama,<sup>a</sup> Ken-ichi Yamada,<sup>a</sup> Yasutomo Yamamoto<sup>c</sup> and  
Kiyoshi Tomioka\*<sup>c</sup>

<sup>a</sup> Graduate School of Pharmaceutical Sciences, Kyoto University, Yoshida, Sakyo-ku, Kyoto,  
Japan.

<sup>b</sup> The Academy of Fundamental and Interdisciplinary Science, Harbin Institute of Technology,  
Harbin, Heilongjiang, 150080, P. R. China.

<sup>c</sup> Faculty of Pharmaceutical Sciences, Doshisha Women's College of Liberal Arts, Kodo, Kyotanabe,  
Kyoto, Japan. Fax: +81-(0)774-65-8676; Tel: +81-(0)774-65-8658.

tomioka@pharm.kyoto-u.ac.jp

## Experimental Section

### General

All melting points are uncorrected. <sup>1</sup>H (500 MHz), <sup>13</sup>C (125 MHz), and <sup>31</sup>P NMR (202 MHz) were measured in CDCl<sub>3</sub> unless otherwise mentioned. Chemical shifts values were expressed in ppm relative to an internal reference of tetramethylsilane (0 ppm) for <sup>1</sup>H, CDCl<sub>3</sub> (77.0 ppm) for <sup>13</sup>C, and external 85% H<sub>3</sub>PO<sub>4</sub> (0 ppm) for <sup>31</sup>P NMR. <sup>13</sup>C peak multiplicity assignments were made based on DEPT data. *J* values are presented in Hz. Abbreviations are as follows: s, singlet; d, doublet; t, triplet; m, multiplet. IR spectroscopy of oil and solid samples were measured as neat liquid films and KBr pellets, respectively. The wave-numbers of maximum absorption peaks of IR spectroscopy were presented in cm<sup>-1</sup>. *N*-(Diphenylphosphinoyl)imines **2a**, **2d**, **2f**, and **2h**;<sup>1</sup> **2b** and **2e**;<sup>2</sup> **2c**;<sup>3</sup> and **2g**<sup>4</sup> were prepared according to the reported procedures.<sup>5</sup>

1 Lauzon, C.; Desrosiers, J.; Charette, A. B. *J. Org. Chem.* **2005**, *70*, 10579–10580.

2 Ballweg, D. M.; Miller, R. C.; Gray, D. L.; Scheidt, K. A. *Org. Lett.* **2005**, *7*, 1403–1406.

3 Boezio, A. A.; Pytkowicz, J.; Côté, A.; Charette, A. B. *J. Am. Chem. Soc.* **2003**, *125*, 14260–14261.

4 Rudolph, J.; Schmidt, F.; Bolm, C. *Adv. Synth. Catal.* **2004**, *346*, 867–872.

## Supporting Information

**General Procedure for Catalytic Asymmetric Phenylation:** Under argon atmosphere, a round-bottom flask was charged with Rh(acac)(C<sub>2</sub>H<sub>4</sub>)<sub>2</sub> (3.1 mg, 0.012 mmol), ligand **1** (6.5 mg, 0.013 mmol), imine **2** (0.20 mmol), triphenylborane (81 mg, 0.33 mmol), and 50% KF on celite (40 mg). To the flask were added *t*-BuOH (0.5 mL). The mixture was stirred and heated in a preheated oil bath at 100 °C. After the indicated period, the mixture was diluted with AcOEt, washed with brine, dried over Na<sub>2</sub>SO<sub>4</sub>, and then concentrated. The resulting residue was purified through silica gel column chromatography.

Specific rotation values and <sup>1</sup>H, <sup>13</sup>C, and <sup>31</sup>P NMR; IR; and MS spectra of the products **4b**, **4c**, **4e**, and **4f** were in agreement with those in our previous report.<sup>6</sup> The absolute configuration of the above products was determined on the basis of the specific rotation and that of the others was tentatively assigned by analogy.

**Table 2, entry 2; (+)-*N*-[(3-methylphenyl)(phenyl)methyl]-*P,P*-diphenylphosphinamide (**4d**):**

Purification by column chromatography (hexane/AcOEt = 1/1) gave the product as a white solid (73 mg, 92%). mp: 149–150 °C. [ $\alpha$ ]<sub>D</sub><sup>25</sup> +1.8 (*c* 1.02, CHCl<sub>3</sub>). 96% ee (HPLC: Daicel Chiralcel OD-H, hexane/*i*-PrOH = 25/1, 1.0 mL/min, 254 nm, major 17.8 min and minor 16.4 min). <sup>1</sup>H NMR: 2.29 (3H, s), 3.59 (1H, dd, *J* = 6.7, 10.1), 5.42 (1H, dd, *J* = 10.1, 10.7), 7.01–7.09 (3H, m), 7.17–7.22 (1H, m), 7.23–7.32 (5H, m), 7.34–7.40 (4H, m), 7.41–7.49 (2H, m), 7.80–7.88 (4H, m). <sup>13</sup>C NMR: 21.4 (CH<sub>3</sub>), 58.5 (CH), 124.6 (CH), 127.1 (CH), 127.6 (CH), 128.0 (CH), 128.4 (d, *J* = 15.4, CH), 128.5 (CH), 131.9 (d, *J* = 2.1, CH), 132.28 (d, *J* = 9.8, CH), 132.36 (d, *J* = 9.8, CH), 132.40 (d, *J* = 128, C), 132.5 (d, *J* = 128, C), 138.1 (C), 143.3 (d, *J* = 5.2, C), 143.5 (d, *J* = 5.2, C). <sup>31</sup>P NMR: 22.3. IR: 1188, 694. EIMS *m/z*: 397 (M<sup>+</sup>). Anal. Calcd for C<sub>26</sub>H<sub>24</sub>NOP: C, 78.57; H, 6.09; N, 3.52. Found: C, 78.56; H, 6.13; N, 3.62.

**Table 2, entry 5; (–)-*N*-[(2-chlorophenyl)(phenyl)methyl]-*P,P*-diphenylphosphinamide (**4g**):**

Purification by column chromatography (hexane/acetone = 4/1) gave the product as a pale yellow

---

5 (a) Yamada, K.; Harwood, S. J.; Gröger, H.; Shibasaki, M. *Angew. Chem., Int. Ed.* **1999**, *38*, 3504–3506. (b) Jennings, W. B.; Lovely, C. J. *Tetrahedron* **1991**, *47*, 5561–5568.

## Supporting Information

amorphous (70 mg, 84%).  $[\alpha]_{\text{D}}^{25} -46.1$  (*c* 1.01,  $\text{CHCl}_3$ ). 93% ee (HPLC: Daicel Chiralcel OD-H, hexane/*i*-PrOH = 10/1, 1.0 mL/min, 254 nm, major 10.2 min and minor 9.4 min).  $^1\text{H}$  NMR: 3.88 (1H, dd, *J* = 7.9, 9.9), 5.76 (1H, dd, *J* = 9.9, 10.8), 7.20–7.24 (2H, m), 7.25–7.35 (8H, m), 7.41–7.53 (5H, m), 7.74–7.82 (2H, m), 7.87–7.94 (2H, m).  $^{13}\text{C}$  NMR: 56.4 (CH), 125.8 (CH), 127.0 (CH), 127.3 (CH), 127.4 (CH), 128.4 (d, *J* = 12.4, CH), 128.5 (d, *J* = 12.4, CH), 129.5 (CH), 130.0 (CH), 131.7 (d, *J* = 130, C), 131.9 (d, *J* = 3.1, CH), 132.0 (d, *J* = 3.1, CH), 132.1 (d, *J* = 10.3, CH), 132.4 (d, *J* = 10.3, CH), 132.8 (d, *J* = 128, C), 133.0 (C), 140.3 (d, *J* = 4.1, C), 142.0 (d, *J* = 4.1, C).  $^{31}\text{P}$  NMR: 22.2. IR: 1188, 694. EIMS *m/z*: 417 ( $\text{M}^+$ ). Anal. Calcd for  $\text{C}_{25}\text{H}_{21}\text{ClNOP}$ : C, 71.86; H, 5.07; N, 3.35. Found: C, 71.98; H, 5.18; N, 3.37.

**Table 2, entry 7; (+)-*N*-[(2-naphthyl)(phenyl)methyl]-*P,P*-diphenylphosphinamide (4h):**

Purification by column chromatography (hexane/acetone = 4/1) gave the product as a pale yellow amorphous (81 mg, 94%).  $[\alpha]_{\text{D}}^{25} +13.0$  (*c* 1.00,  $\text{CHCl}_3$ ). 90% ee (HPLC: Daicel Chiralpak AD-H, hexane/*i*-PrOH = 4/1, 1.0 mL/min, 254 nm, major 11.6 min and minor 13.2 min).  $^1\text{H}$  NMR: 3.69 (1H, dd, *J* = 6.4, 10.3), 5.63 (1H, dd, *J* = 10.3, 11.1), 7.25 (1H, m), 7.30–7.44 (10H, m), 7.45–7.49 (3H, m), 7.64 (1H, m), 7.75–7.88 (7H, m).  $^{13}\text{C}$  NMR: 58.4 (CH), 125.9 (CH), 126.0 (CH), 126.19 (CH), 126.22 (CH), 127.3 (CH), 127.6 (CH), 127.7 (CH), 128.1 (CH), 128.43 (d, *J* = 12.4, CH), 128.46 (CH), 128.48 (d, *J* = 12.4, CH), 128.6 (CH), 131.9 (d, *J* = 3.1, CH), 132.0 (d, *J* = 3.1, CH), 132.3 (d, *J* = 130, C), 132.31 (d, *J* = 9.3, CH), 132.35 (d, *J* = 9.3, CH), 132.4 (d, *J* = 129, C), 132.7 (C), 133.2 (C), 140.7 (d, *J* = 5.1, C), 143.2 (d, *J* = 4.1, C).  $^{31}\text{P}$  NMR: 22.4. IR: 1196, 694. EIMS *m/z*: 433 ( $\text{M}^+$ ). Anal. Calcd for  $\text{C}_{29}\text{H}_{24}\text{NOP}$ : C, 80.35; H, 5.58; N, 3.23. Found: C, 80.22; H, 5.58; N, 3.25.

**Table 2, entry 8; (+)-*N*-[(2-furyl)(phenyl)methyl]-*P,P*-diphenylphosphinamide (4i):**

Purification by column chromatography (hexane/acetone = 4/1) gave the product as a white solid (64 mg, 86%). mp: 134–135 °C.  $[\alpha]_{\text{D}}^{25} +3.3$  (*c* 1.02,  $\text{CHCl}_3$ ). 91% ee (HPLC: Daicel Chiralpak

### Supporting Information

AD-H x 2, hexane/*i*-PrOH = 4/1, 0.5 mL/min, 254 nm, major 21.6 min and minor 20.3 min).  $^1\text{H}$  NMR: 3.71 (1H, t,  $J = 8.6$ ), 5.46 (1H, t,  $J = 10.4$ ), 6.12 (1H, d,  $J = 3.1$ ), 6.27 (1H, d,  $J = 3.1$ ), 7.20–7.27 (1H, m), 7.28–7.33 (4H, m), 7.35 (1H, m), 7.36–7.44 (4H, m), 7.45–7.50 (2H, m), 7.81–7.89 (4H, m).  $^{13}\text{C}$  NMR: 52.9 (CH), 107.6 (CH), 110.2 (CH), 127.2 (CH), 127.7 (CH), 128.4 (d,  $J = 12.4$ , CH), 128.5 (d,  $J = 12.4$ , CH), 128.6 (CH), 131.9 (d,  $J = 3.1$ , CH), 132.0 (d,  $J = 3.1$ , CH), 132.16 (d,  $J = 129$ , C), 132.17 (d,  $J = 10.3$ , CH), 132.36 (d,  $J = 9.3$ , CH), 132.40 (d,  $J = 128$ , C), 141.2 (d,  $J = 5.1$ , C), 142.3 (CH), 155.0 (d,  $J = 5.2$ , C).  $^{31}\text{P}$  NMR: 22.2. IR: 1188, 732, 694. EIMS  $m/z$ : 373 ( $\text{M}^+$ ).  
Anal. Calcd for  $\text{C}_{23}\text{H}_{20}\text{NO}_2\text{P}$ : C, 73.98; H, 5.40; N, 3.75. Found: C, 73.70; H, 5.57; N, 3.67.
